# Supplementary material
Source: PubMed Central journal article supplement (PMC7153644)
Supplement: Supp_FigS2.pdf [file Supp_FigS2.pdf]

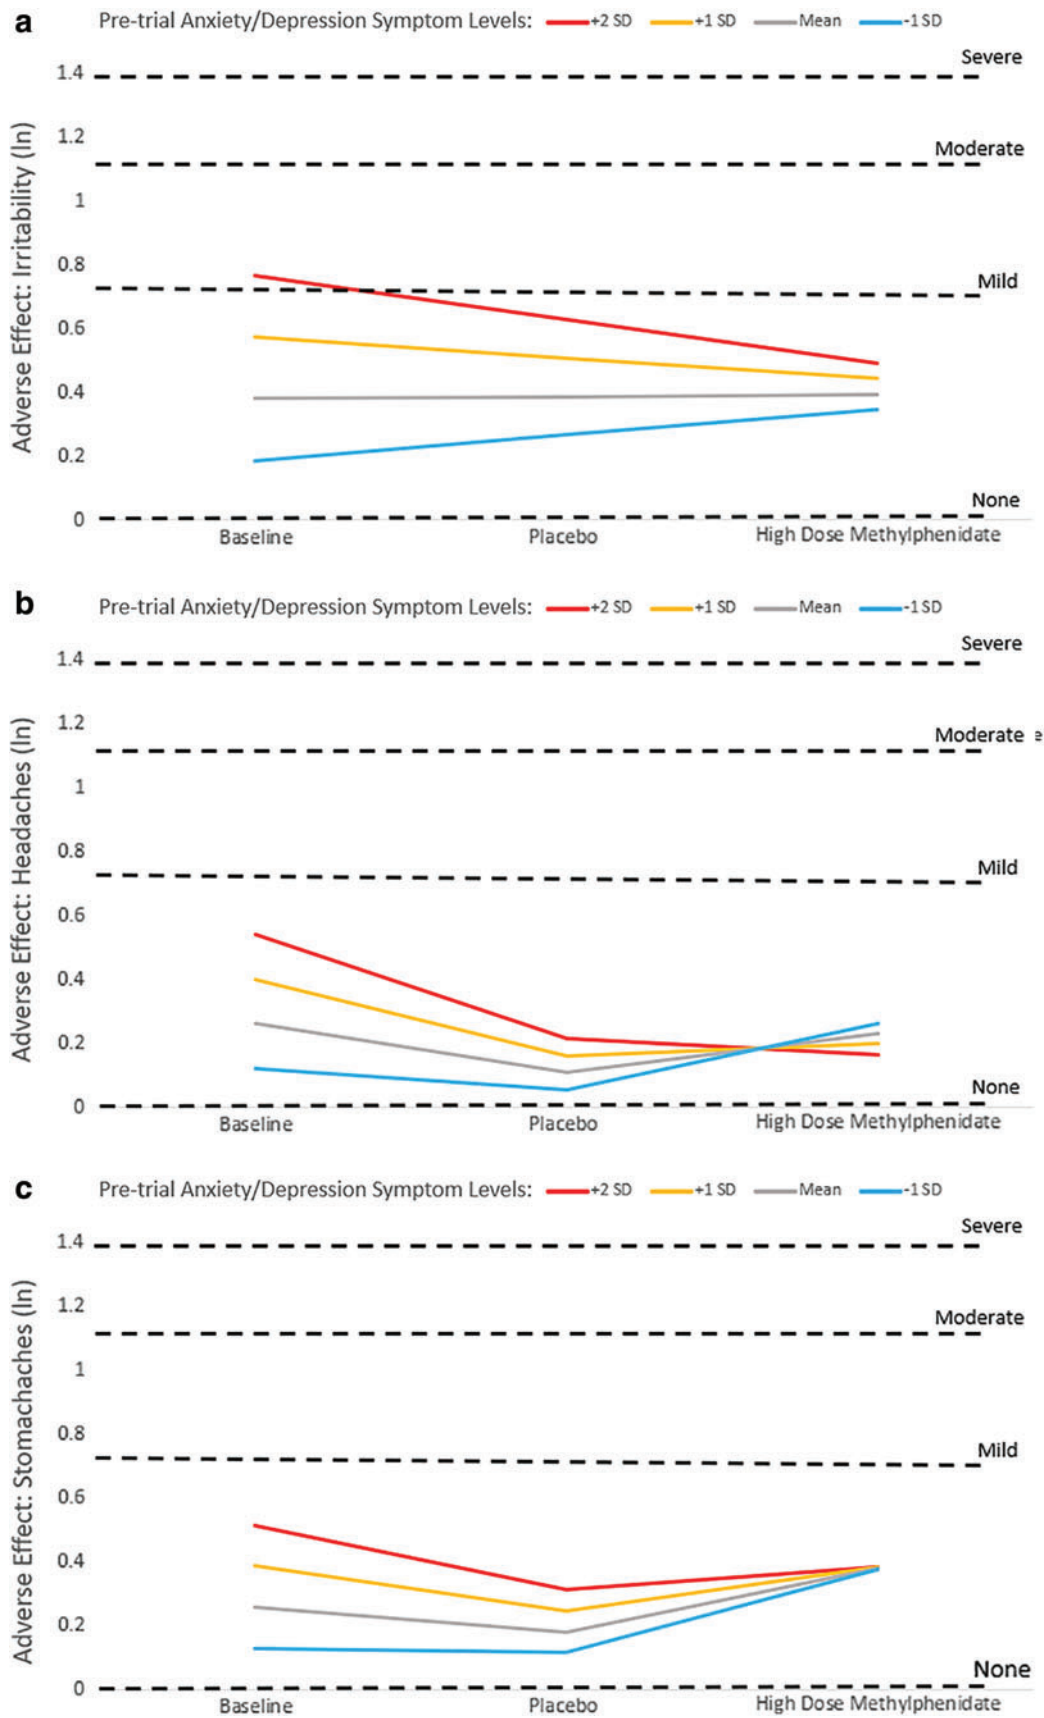

**SUPPLEMENTARY FIG. S2.** (a–h) Adverse effect ratings during baseline, placebo, and high dose methylphenidate conditions by level of pretrial anxiety/depression symptoms. ln, natural log of adverse effect rating, with dashed lines indicating the ln score that corresponds to adverse effect parent ratings of mild, moderate, and severe. SD, standard deviation.

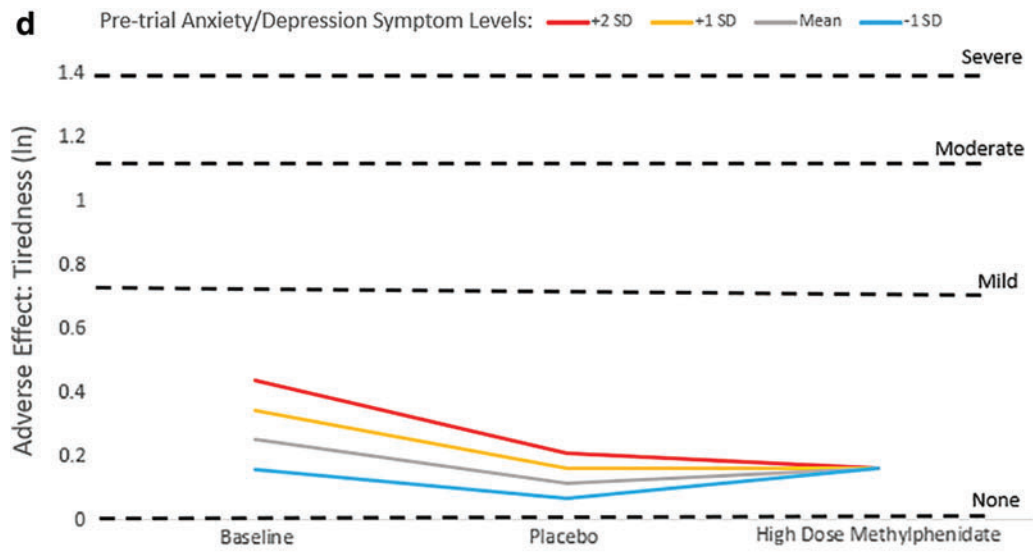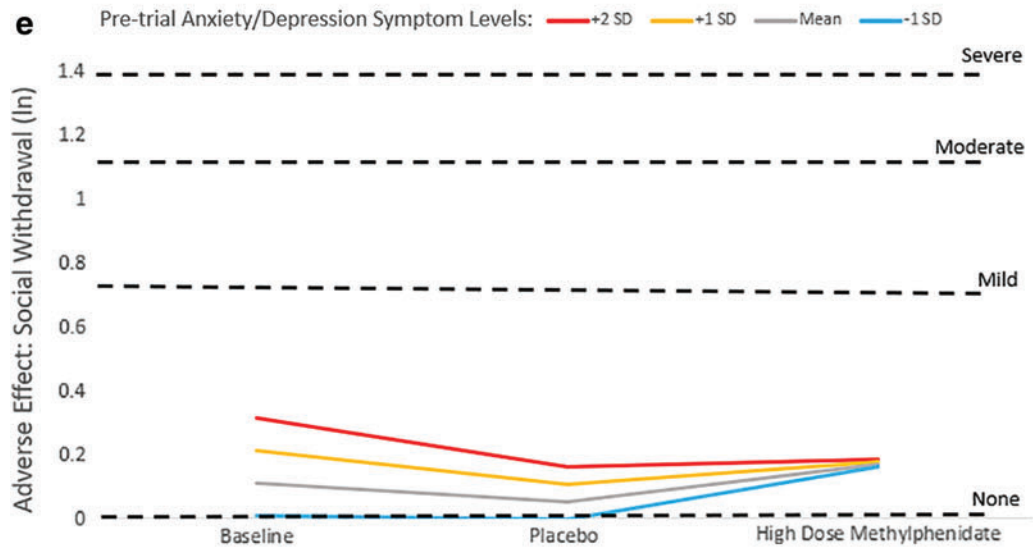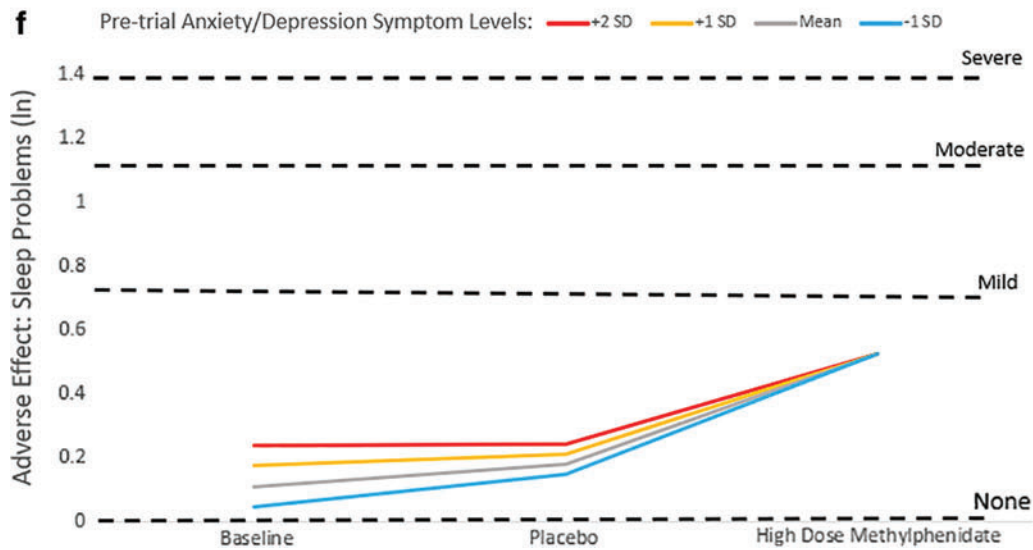

SUPPLEMENTARY FIG. S2. (Continued).

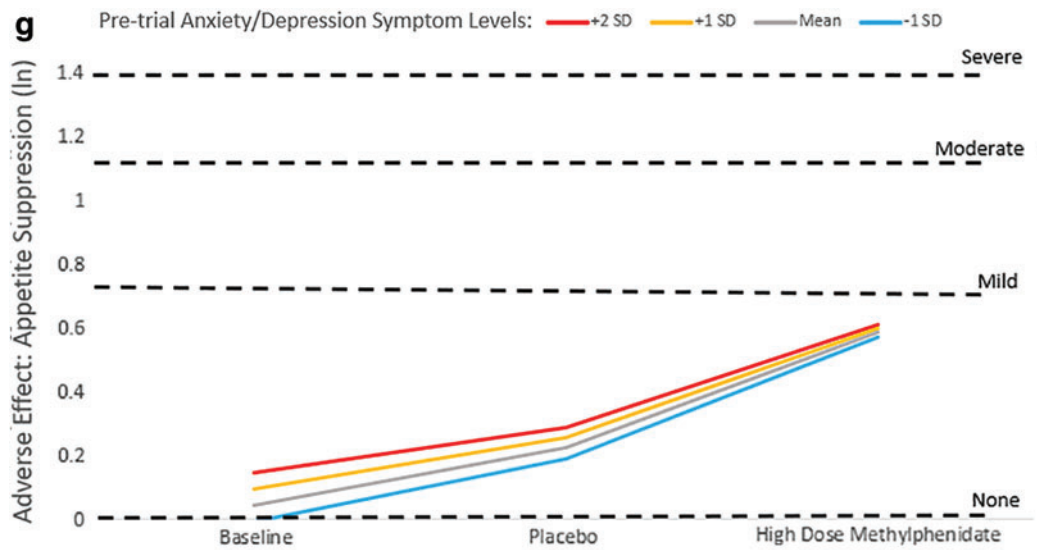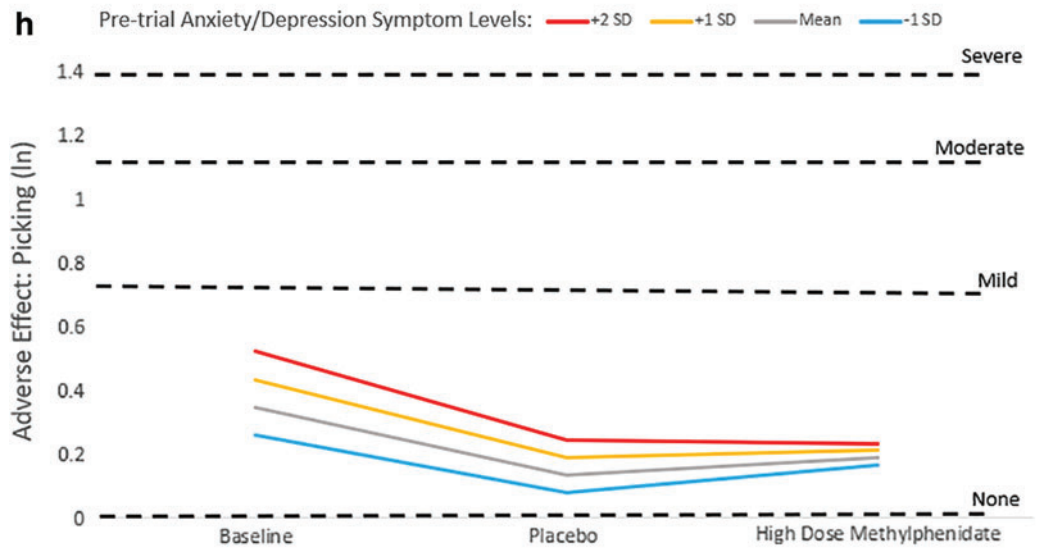

SUPPLEMENTARY FIG. S2. (Continued).
