# Supplementary material
Source: PubMed Central journal article supplement (PMC7153644)
Supplement: Supp_FigS3.pdf [file Supp_FigS3.pdf]

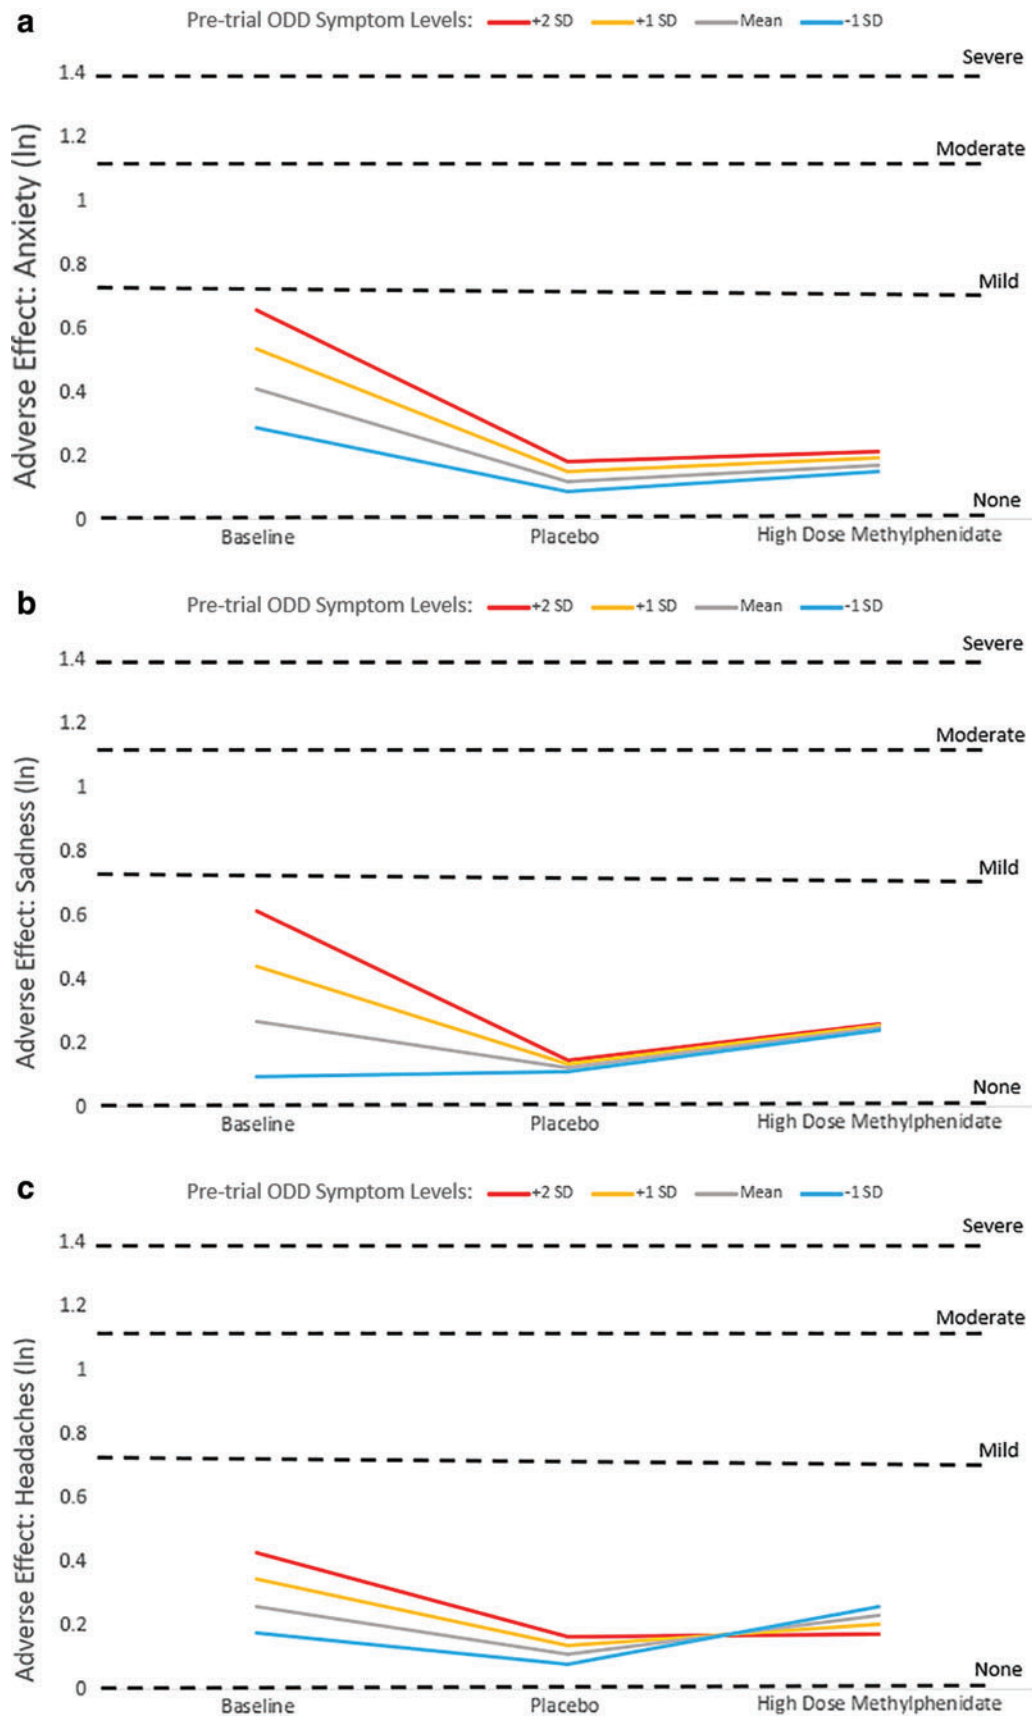

**SUPPLEMENTARY FIG. S3.** (a-i) Adverse effect ratings during baseline, placebo, and high dose methylphenidate conditions by level of premedication ODD symptoms. ln, natural log of adverse effect rating, with dashed lines indicating the ln score that corresponds to adverse effect parent ratings of mild, moderate, and severe. ODD, oppositional defiant disorder; SD, standard deviation.

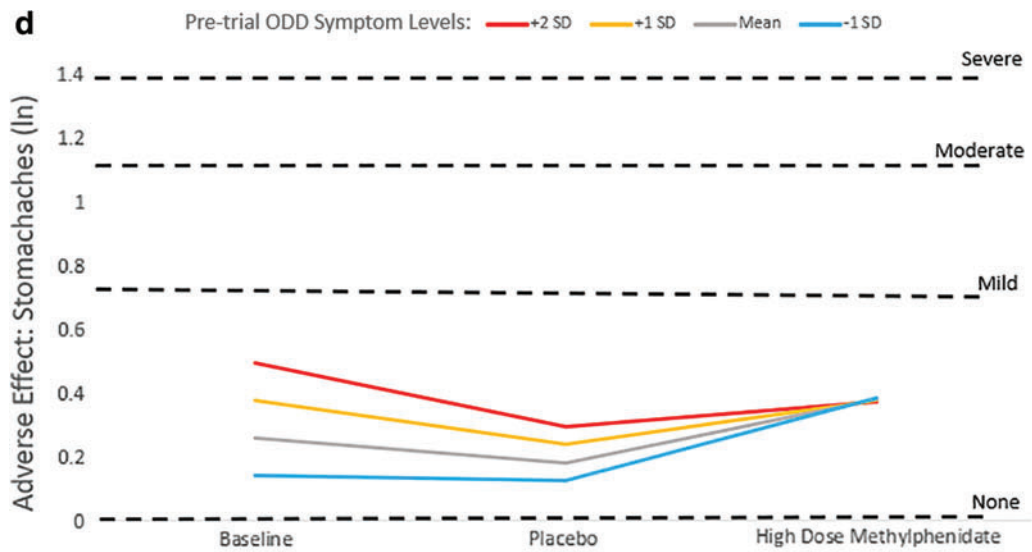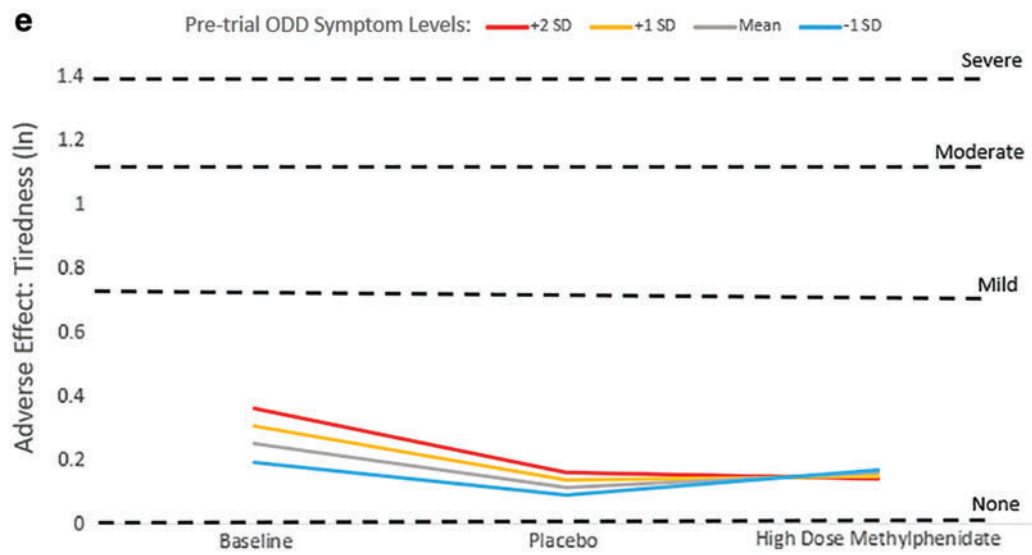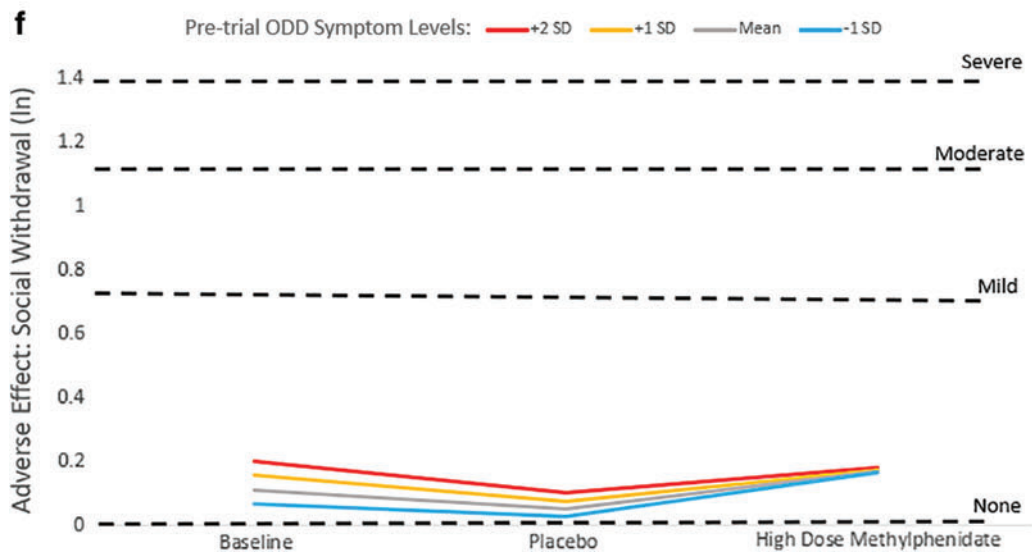

SUPPLEMENTARY FIG. S3. (Continued).

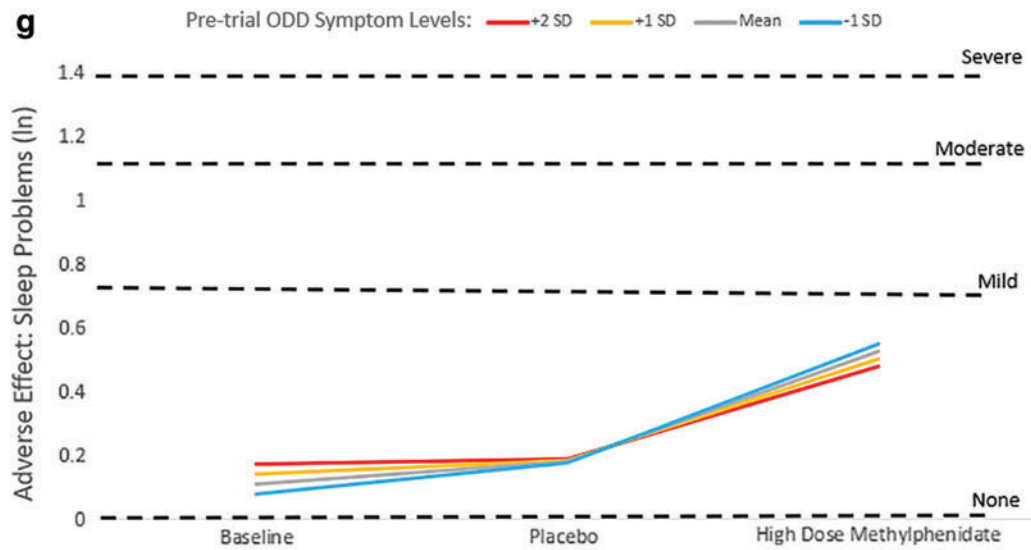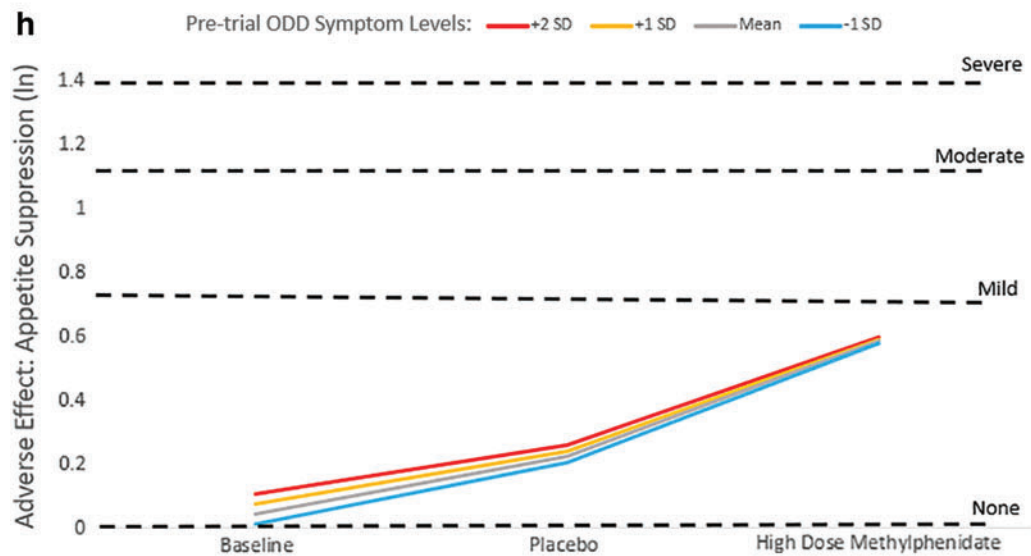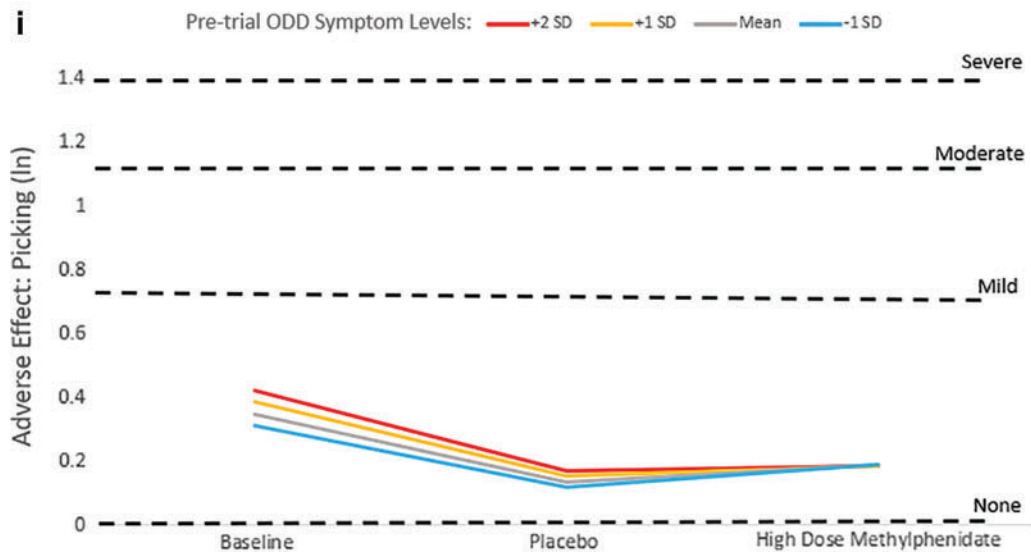

SUPPLEMENTARY FIG. S3. (Continued).
