# Supplementary material
Source: PubMed Central journal article supplement (PMC7153644)
Supplement: Supp_TableS1.pdf [file Supp_TableS1.pdf]

SUPPLEMENTARY TABLE S1. DEMOGRAPHIC AND CLINICAL CHARACTERISTICS OF SAMPLE (N=171)

|                                                                                        |                      |
|----------------------------------------------------------------------------------------|----------------------|
| Mean (SD) age in years (SD)                                                            | 8.44 (1.26)          |
| Female, <i>n</i> (%)                                                                   | 49 (29)              |
| Race/ethnicity <sup>a</sup> , <i>n</i> (%)                                             |                      |
| White, non-Hispanic                                                                    | 139 (81)             |
| African American, Hispanic, other                                                      | 28 (16) <sup>a</sup> |
| ADHD subtype, <i>n</i> (%)                                                             |                      |
| Inattentive type                                                                       | 126 (74)             |
| Combined type                                                                          | 45 (26)              |
| Met criteria for any anxiety disorder <sup>b</sup> on the DISC, <i>n</i> (%)           | 21 (12)              |
| Met criteria for a mood disorder <sup>c</sup> on the DISC, <i>n</i> (%)                | 2 (1)                |
| Met criteria for a disruptive behavior disorder <sup>d</sup> on the DISC, <i>n</i> (%) | 45 (26)              |
| Titration dose schedules (by weight), <i>n</i> (%)                                     |                      |
| Low weight (≤25 kg)                                                                    | 137 (80)             |
| High weight (>25 kg)                                                                   | 34 (20)              |
| VADPRS anxiety/depression score, mean (SD) [range: 0–21]                               | 5.25 (4.70)          |
| VADPRS oppositional defiant score, mean (SD) [range: 0–24]                             | 7.95 (6.67)          |

<sup>a</sup>Reported by a parent/caregiver, four participants were missing information about race/ethnicity.

<sup>b</sup>Social phobia, separation anxiety, panic agoraphobia, generalized anxiety disorder, obsessive compulsive disorder, and/or posttraumatic stress disorder.

<sup>c</sup>Major depressive episode/dysthymia.

<sup>d</sup>Oppositional defiant or conduct disorder.

ADHD, attention-deficit/hyperactivity disorder; DISC, diagnostic interview schedule for children; SD, standard deviation; VADPRS, Vanderbilt ADHD Diagnostic Parent Rating Scale.
