# Supplementary material
Source: PubMed Central journal article supplement (PMC7153644)

## Supplementary Data

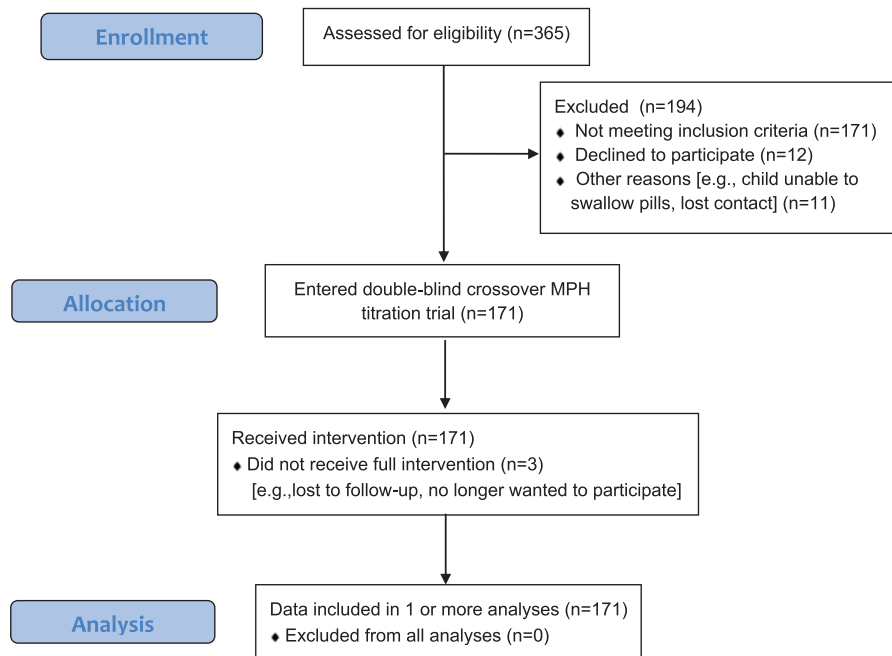

**SUPPLEMENTARY FIG. S1.** CONSORT flow diagram. MPH, methylphenidate.

Supplement: Supp_FigS1.pdf [file Supp_FigS1.pdf]
